# Supplementary material
Source: PubMed Central journal article supplement (PMC2604800)

**A**

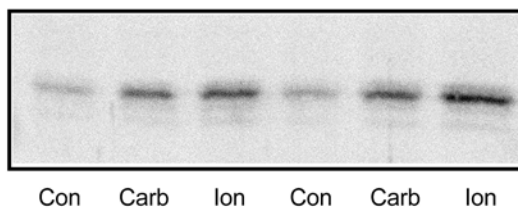

**B**

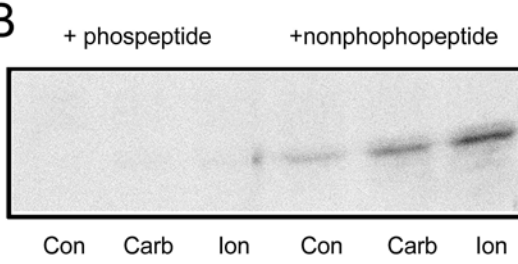

Supplement: 90345.2008_1.pdf [file 90345.2008_1.pdf]

A

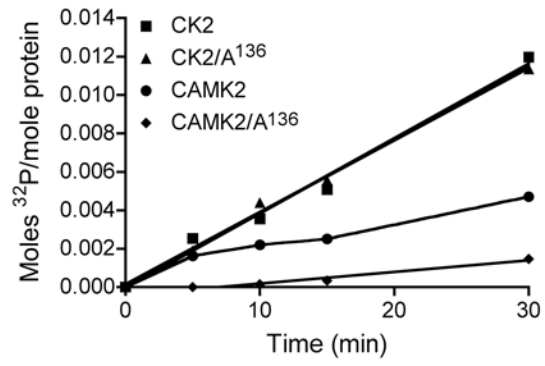

B

| Time (min)             | 0 | 1 | 2 | 5 | 10 | 15 | 30 |
|------------------------|---|---|---|---|----|----|----|
| CK2                    | + | - | + | - | +  | -  | +  |
| CAMK2                  | + | + | - | + | -  | +  | -  |
| CAMK2/A <sup>136</sup> | - | - | - | - | -  | -  | +  |

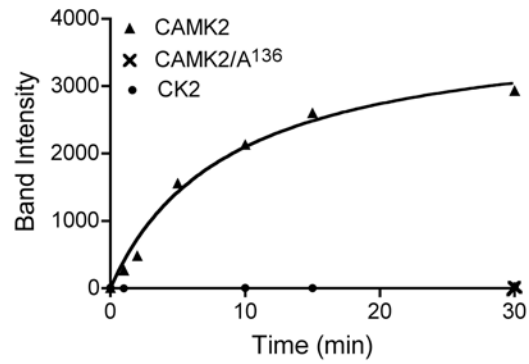

Supplement: 90345.2008_2.pdf [file 90345.2008_2.pdf]
